# Supplementary material
Source: publisher site journal article supplement (https://www.kjim.org/upload/media/kjim-2021-458-suppl3.pdf)
Supplement: Supplementary file 1 [file kjim-2021-458-suppl3.pdf]

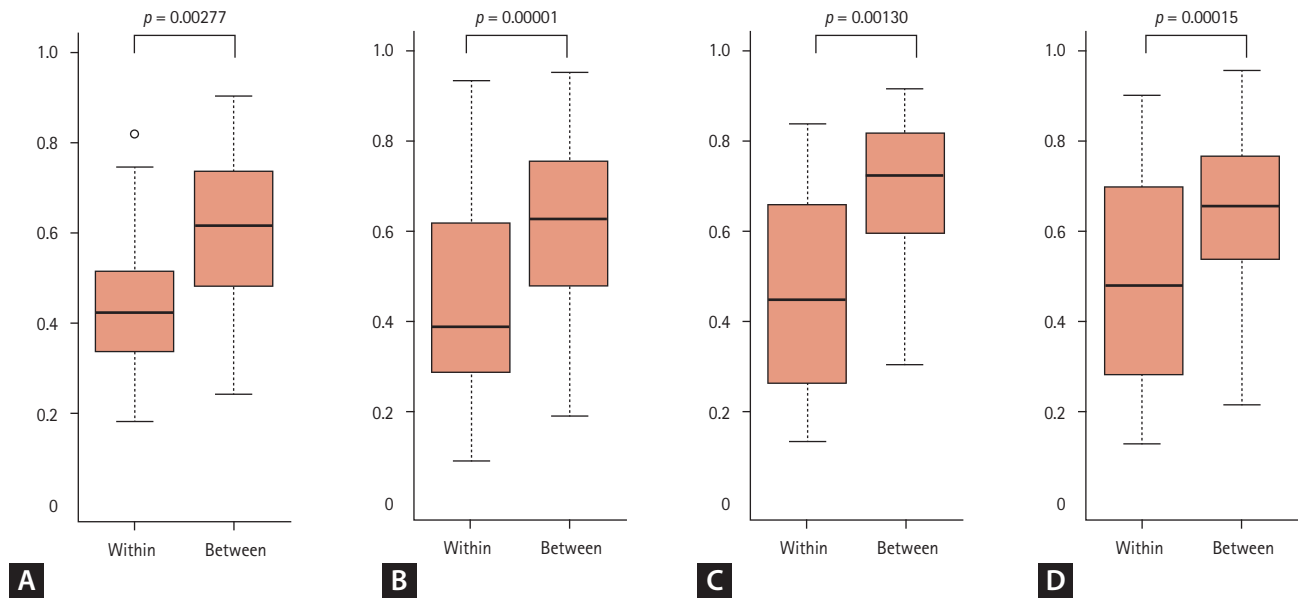

**Supplementary Figure 3.** Bray-Curtis  $\beta$ -diversity within versus between the pairs of before and after treatment. (A, B) Panels represent the placebo group having no response and responses, respectively. (C, D) The samples were treated by *Escherichia coli* Nissle 1917 (EcN) reporting no response and responses, respectively. The  $p$  values between groups were from  $t$  test calculated with  $R$ .
